# Supplementary material
Source: PubMed Central journal article supplement (PMC4212445)
Supplement: DS_10.11771715163514536678_Appendix1.pdf [file DS_10.11771715163514536678_Appendix1.pdf]

# Appendix 1: Flow diagram

## Identification

2700 records total identified through database searching

85 additional records identified through online search

## Screening

2452 records after duplicates removed

2452 titles screened → 1977 excluded

475 abstracts → 295 excluded\*

**Reasons:**

- Pilot project or study (*n*=51)
- Did not describe a pharmacist remuneration program (*n*=209)
- 1 location (*n*=40)
- Described an injections program (*n*=1)
- Cannot access full text (*n*=10)

## Eligibility

180 Full-text articles assessed for eligibility → 147 excluded\*

**Reasons:**

- Pilot project or study (*n*=23)
- Did not describe a pharmacist remuneration program (*n*=100)
- 1 location (*n*=15)
- Described an injections program (*n*=2)
- Cannot access full text (*n*=5)
- Described in previous SR (*n*=8)

## Included

33 studies included

118 records included

\* The sum of studies included per reason exceeds the number of articles excluded since multiple criteria applied to some excluded articles.
